# Supplementary material
Source: publisher site journal article supplement (https://www.dovepress.com/article/402592)

Figure S1

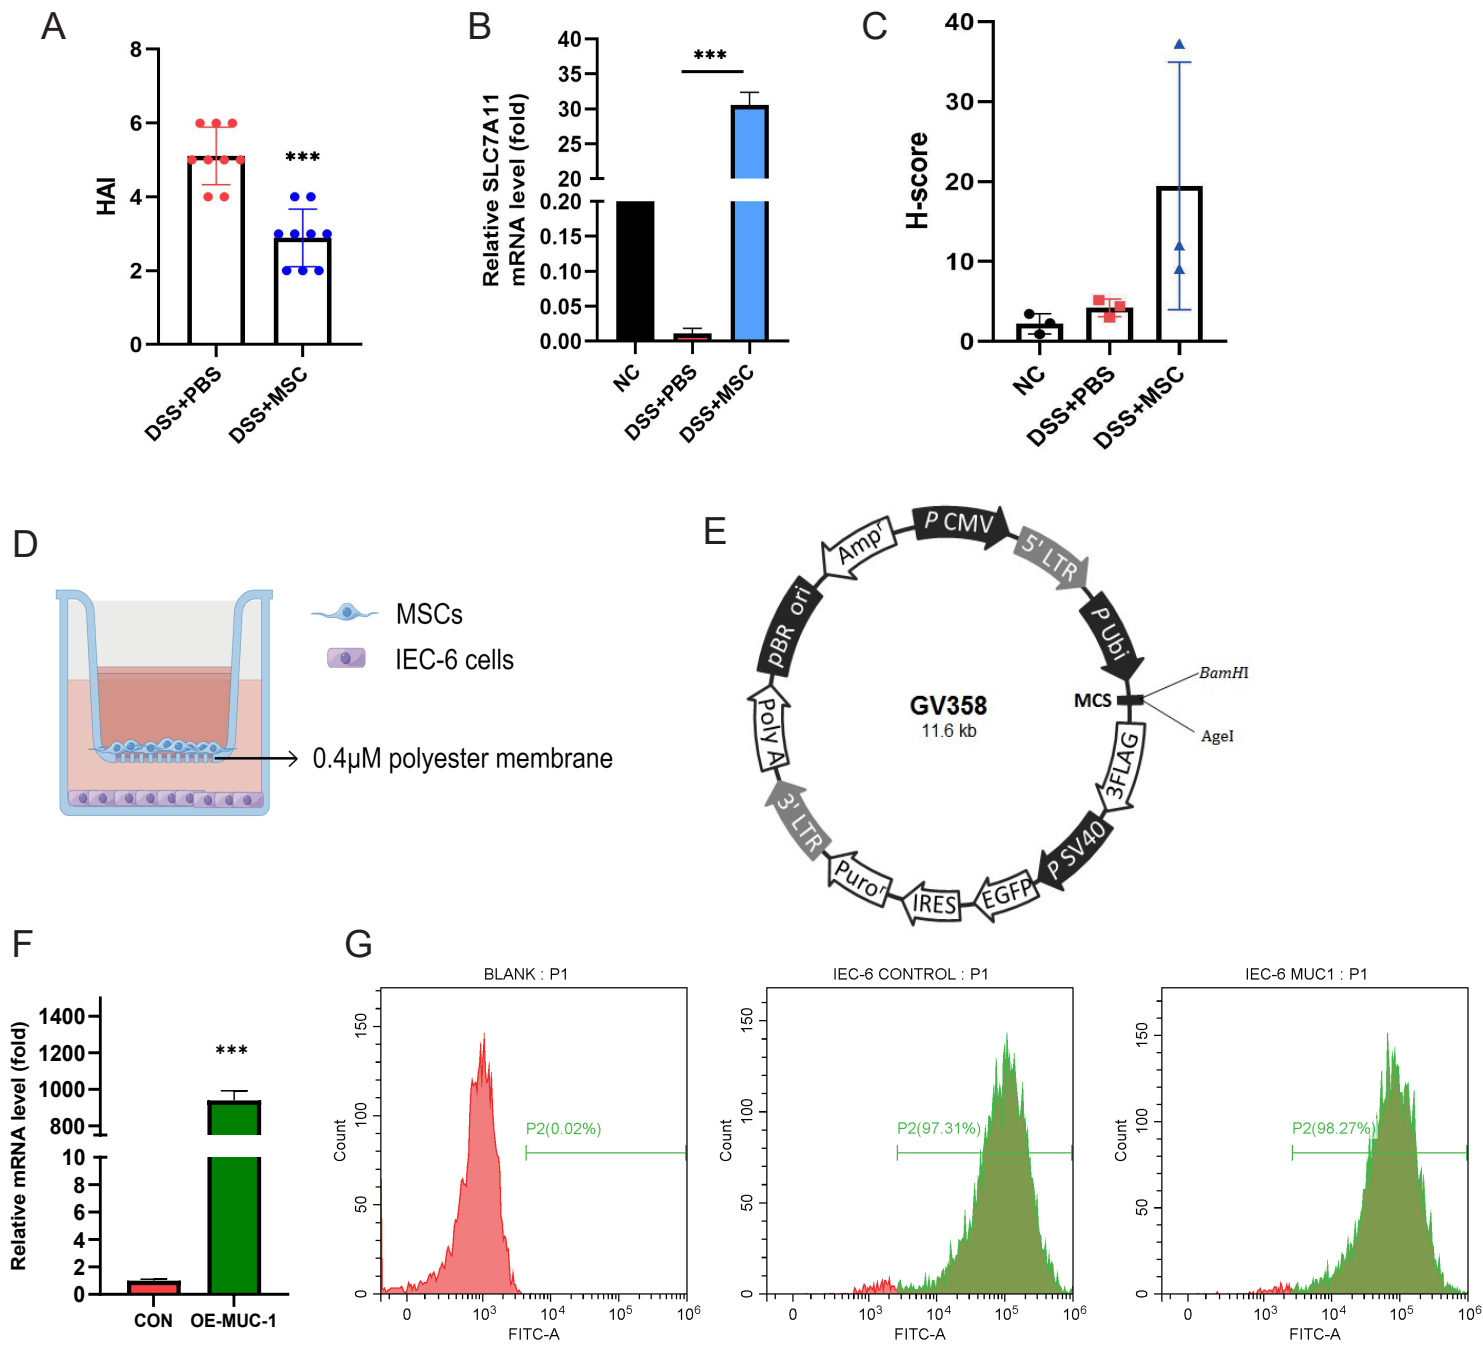

Figure S2

A

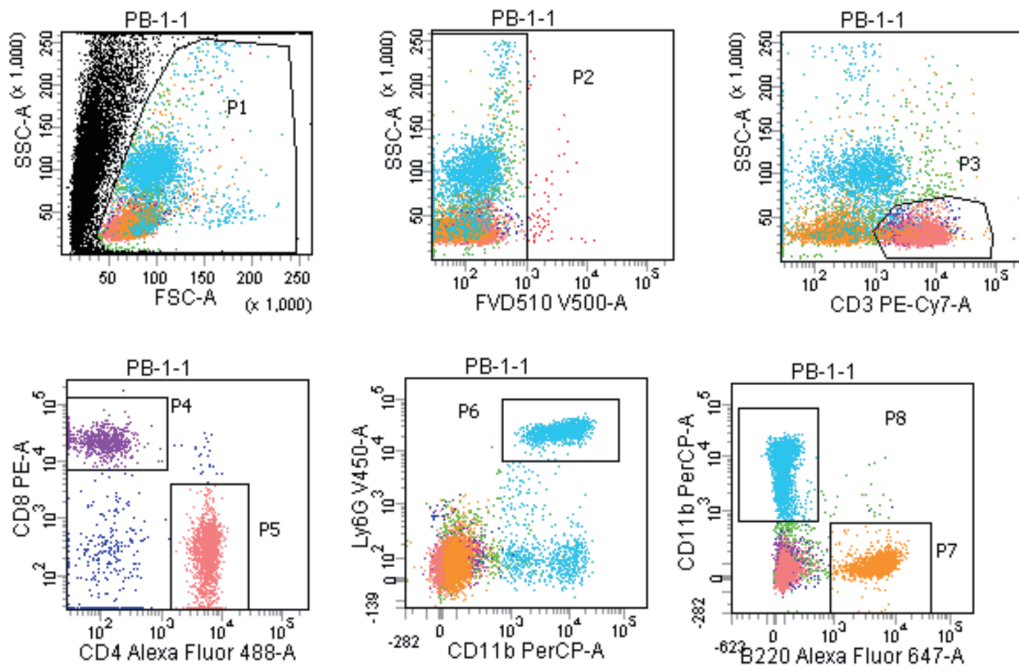

B

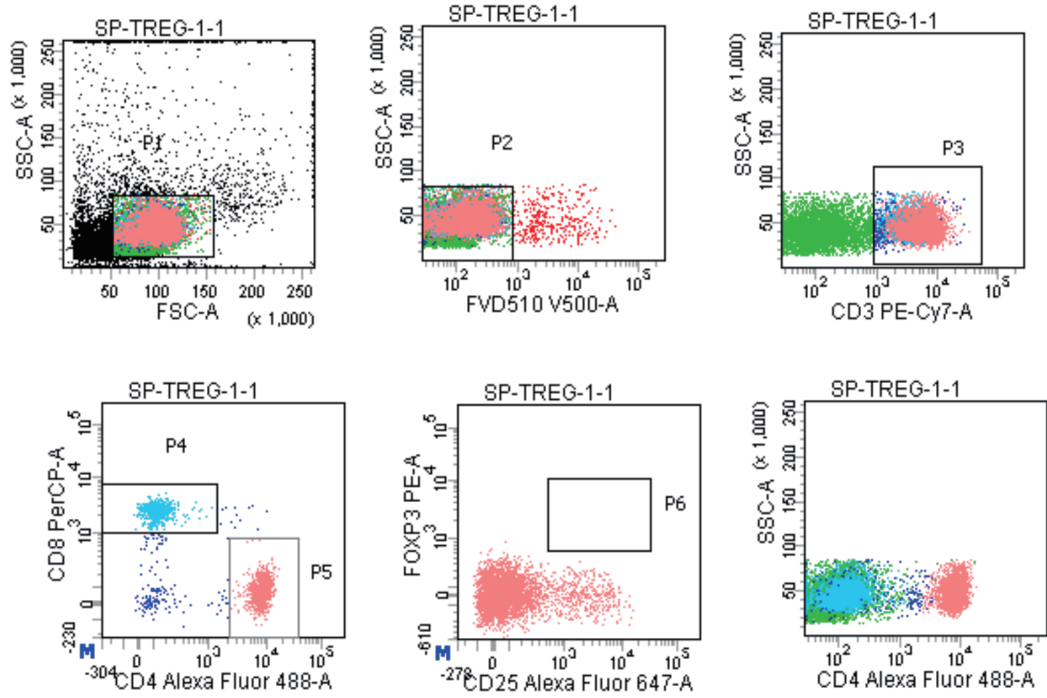

C

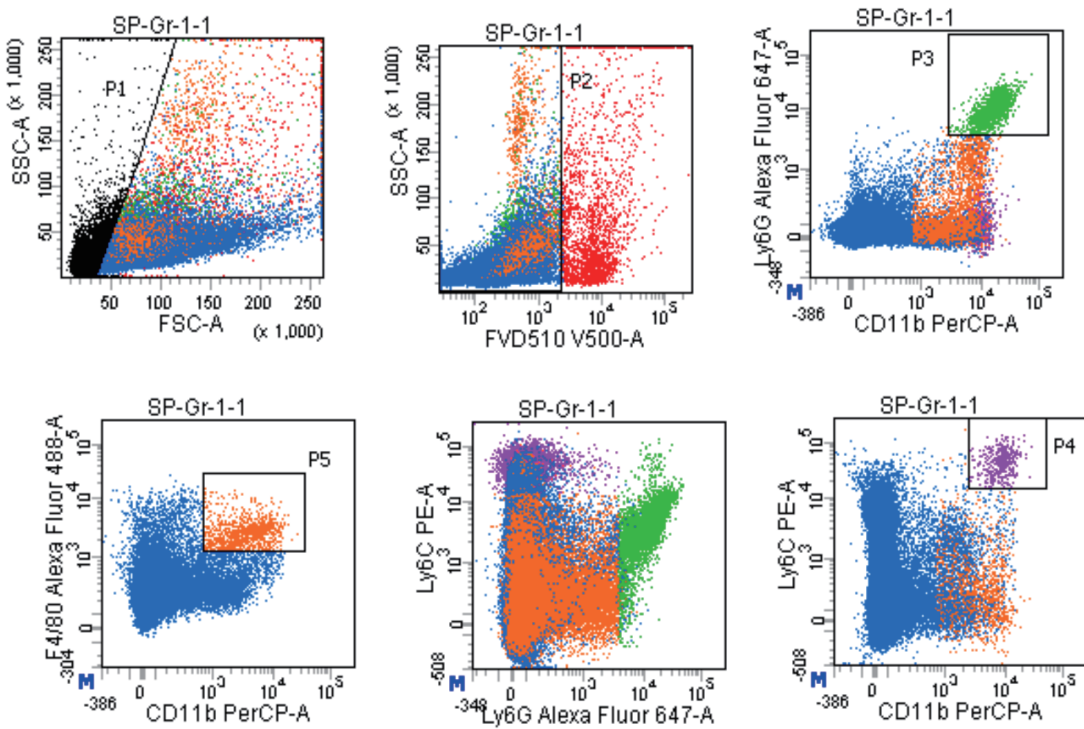

Supplement: Supplementary file 1 [file 402592 Figures_S1-3.pdf › 402592 Figures_S1-3.pdf]
